# Supplementary material for: A novel electrochemiluminescence biosensor based on S-doped yttrium oxide ultrathin nanosheets for the detection of anti-Dig antibodies
Source: Royal Society of Chemistry journal article supplement (doi:10.1039/c8an00667a), 2018-01-01
Supplement: c8an00667a1.pdf [file c8an00667a1.pdf]

1                    **Electronic Supplementary Information (ESI)**

2 A novel electrochemiluminescence biosensor based on S-doped yttrium  
3 oxide ultrathin nanosheets for detection of anti-Dig antibodies

4 **Huan Gao,<sup>a</sup> Suli Liu,<sup>b</sup> Zhaoyin Wang,<sup>a</sup> Ling Si,<sup>\*a</sup> and Zhihui Dai<sup>\*ac</sup>**

5 *<sup>a</sup>Jiangsu Collaborative Innovation Centre of Biomedical Functional Materials and*  
6 *Jiangsu Key Laboratory of Biofunctional Materials, School of Chemistry and*  
7 *Materials Science, Nanjing Normal University, Nanjing, 210023, P. R. China.*

8 *<sup>b</sup>Department of Chemistry, Nanjing Xiaozhuang College, Nanjing, 211171, P. R.*  
9 *China.*

10 *<sup>c</sup>Nanjing Normal University Centre for Analysis and Testing, Nanjing, 210023, P.*  
11 *R. China.*

12

13 \*The corresponding author, E-mail: [daizhihuii@njnu.edu.cn](mailto:daizhihuii@njnu.edu.cn); [07162@njnu.edu.cn](mailto:07162@njnu.edu.cn).

14

## 1 **Experimental section**

### 2 **Materials and reagents.**

3 Yttrium nitrate hexahydrate ( $\text{YNO}_3 \cdot 6\text{H}_2\text{O}$ , 99.5%), dodecylamine (DDA, 95%),  
4 oleic acid (OA) were purchased from Aladdin (Shanghai, China). Thiourea  
5 ( $\text{H}_2\text{NCSNH}_2$ , >99%), NaCl, KCl,  $\text{K}_4\text{Fe}(\text{CN})_6$ ,  $\text{K}_3\text{Fe}(\text{CN})_6$ ,  $\text{Na}_2\text{HPO}_4$ ,  $\text{KH}_2\text{PO}_4$ , acetic  
6 acid were of analytical grade and purchased from Sinopharm Chemical Reagent Co.,  
7 Ltd (Shanghai, China). 1-Octadecene (ODE, 90%), polyclonal N-hydroxysuccinimide  
8 (NHS, 98%), N-(3-dimethylaminopropyl)-N'-ethylcarbodiimide (EDC) and chitosan  
9 (CS) were obtained from Sigma-Aldrich Company. Anti-digoxigenin (anti-Dig) from  
10 sheep (150kDa), polyclonal rabbit anti-dinitrophenol (anti-DNP) were bought from  
11 Abcam (Shanghai, China). Phosphate buffer saline (PBS, 100 mM, pH 7.4) containing  
12 50 mM  $\text{K}_2\text{S}_2\text{O}_8$  and 0.1 M KCl was used as the test solution. The ultrapure water used  
13 in all experiences was got from a Millipore water purification system (18.2  $\text{M}\Omega \cdot \text{cm}$ ,  
14 Millipore SAS Corporation, France). Streptavidin (STV) and human immunoglobulin  
15 G (IgG), DNA strands were purchased from Sangon Biological Engineering  
16 Technology & Company Ltd (Shanghai, China) and purified with high-performance  
17 liquid chromatography. The sequence was 5'-COOH-CTTCTTCCCTTCC TT-  
18 Digoxigenin-3'. The human serum samples were directly obtained from the Jiangsu  
19 Institute of Cancer Prevention and Cure (China), and they were obtained by  
20 centrifugation for about 10 min with the rotation rate of 2000 rpm.

### 21 **Apparatus.**

22 The ECL measurements were accomplished through ECL instrumentation  
23 containing a three-electrode system that consisted of a glassy carbon electrode (GCE,  
24 4 mm diameters) as working electrode, a platinum wire as counter electrode, and an  
25 Ag/AgCl electrode as reference electrode. The ECL emission was measured by an MPI-  
26 A detection system (Remex Electronic Instrument High-Tech, Xi'an, China).  
27 Electrochemical impedance spectroscopy (EIS) was detected on Autolab  
28 potentiostat/galvanostat PGSTAT302N (Metrohm, BV, The Netherlands) in KCl

1 solution (100 mM) containing  $\text{K}_3\text{Fe}(\text{CN})_6$  /  $\text{K}_4\text{Fe}(\text{CN})_6$  (5.0 mM, 1:1) compound as a  
2 redox probe from 0.1 Hz-100 KHz with a signal amplitude of 10 mV. The X-ray  
3 diffraction (XRD) pattern was acquired on a D/max 2500 VL/PC diffractometer (Japan)  
4 equipped with graphite monochromatized Cu  $\text{K}\alpha$  radiation ( $\lambda = 1.54060 \text{ \AA}$ ) in  $2\theta$   
5 ranging from 5 to 90 °. The transmission electron microscopy (TEM) images were  
6 obtained on a JEM-200CX apparatus (Japan) at an accelerating voltage of 200 kV. X-  
7 ray energy dispersive spectrum (EDS) and elemental mapping were taken on a JEOL-  
8 2100F instrument with an accelerating voltage of 200 kV. Atomic force microscope  
9 (AFM) image was performed by means of Nanoscope IIIa scanning probe microscope  
10 (Agilent, USA).

#### 11 **Synthesis of S-doped $\text{Y}_2\text{O}_3$ ultrathin NSs.**

12 1 mmol (0.383 mg) of  $\text{YNO}_3 \cdot 6\text{H}_2\text{O}$  and 3 mmol (0.2284 g) of  $\text{H}_2\text{NCSNH}_2$  were  
13 mixed with 3 mL of OA, followed by adding 5 mL of DDA and 6mL of ODE under  
14 continuous magnetic stirring at 50 °C water-bath. After stirring for 60 min, the solution  
15 was transferred to a 50 mL Teflon container that was then sealed in a stainless-steel  
16 autoclave. The autoclave was heated in an oven at 180 °C for 36 h. Finally, the product  
17 was collected by centrifugation and washed several times with n-heptane and ethanol.

#### 18 **Synthesis of $\text{Y}_2\text{O}_3$ ultrathin NSs.**

19 The detailed procedure of preparing  $\text{Y}_2\text{O}_3$  ultrathin NSs was similar to that of  
20 preparing S-doped  $\text{Y}_2\text{O}_3$  ultrathin NSs. The only difference was the absence of  
21  $\text{H}_2\text{NCSNH}_2$ .

#### 22 **Synthesis of S-doped $\text{Y}_2\text{O}_3$ ultrathin nanowires.**

23 In a typical synthesis, 1 mmol (0.383 mg) of  $\text{YNO}_3 \cdot 6\text{H}_2\text{O}$  and 3 mmol (0.2284 g)  
24 of  $\text{H}_2\text{NCSNH}_2$  were mixed with 3 mL of OA, followed by adding 5 mL of DDA and  
25 6mL of ODE in a 100 mL three-necked flask at room temperature. The reaction system  
26 was then heated to 280 °C at 5 °C  $\text{min}^{-1}$  and maintained at this temperature for 30 min.  
27 The reactor was then allowed to naturally cool to room temperature. The products were  
28 purified several times with n-heptane and ethanol.

#### 29 **Fabrication of the ECL biosensor.**

1 The GCE was polished successively with 1.0, 0.3 and 0.05  $\mu\text{m}$   $\alpha\text{-Al}_2\text{O}_3$  powders on  
2 chamois leathers and washed ultrasonically with water and ethanol, respectively. Then  
3 the GCE was drying under nitrogen. Subsequently, 10  $\mu\text{L}$  S-doped  $\text{Y}_2\text{O}_3$  solution (0.1  
4  $\text{mg mL}^{-1}$ ) was dropped on the GCE surface and allowed drying under ambient  
5 conditions for 5 h. Afterwards, 4  $\mu\text{L}$  0.1 % (wt) chitosan-acetic acid solution was  
6 dropped on the GCE surface and kept overnight. After drying, the modified electrode  
7 was dropped with 5  $\mu\text{L}$  ultrapure water containing 20  $\text{mg mL}^{-1}$  EDC, 10  $\text{mg mL}^{-1}$  NHS  
8 and 10  $\mu\text{L}$  COOH-DNA (1  $\mu\text{M}$ ) for 45 min at 25  $^\circ\text{C}$ . Then DNA were link to the  
9 electrode surface by the classical EDC coupling reactions between the  $-\text{NH}_2$  groups of  
10 the chitosan-stabilized S-doped  $\text{Y}_2\text{O}_3$  NSs and  $-\text{COOH}$  groups of DNA chains. After  
11 rinsing carefully with 60  $\mu\text{L}$  washing solution (10 mM PBS buffer, 137 mM NaCl, 2.7  
12 mM KCl, pH 7.4), 10  $\mu\text{L}$  different concentrations of anti-Dig antibodies solution (10  
13 mM PBS, 150 mM NaCl, pH 7.4) were dropped onto the electron surface and kept at  
14 room temperature for 1 h. Finally, after rinsing with washing solution, ECL  
15 measurements were carried out. During the process, the voltage of the photomultiplier  
16 tube (PMT) was set at 800 V. The ECL measurements were performed between -2.0  
17 and 0 V at a scan rate of 100  $\text{mV s}^{-1}$ .

18

## 19 Characterization

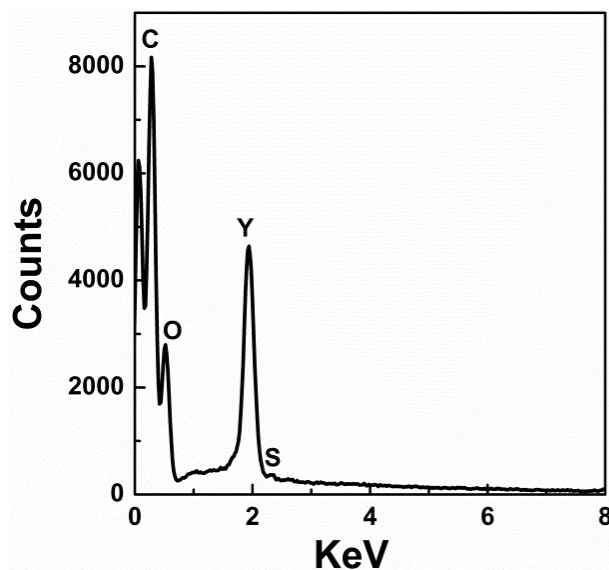

20

21

1 **Fig. S1.** EDS image of S-doped yttrium oxide ( $Y_2O_3$ ) ultrathin nanosheets (NSs).

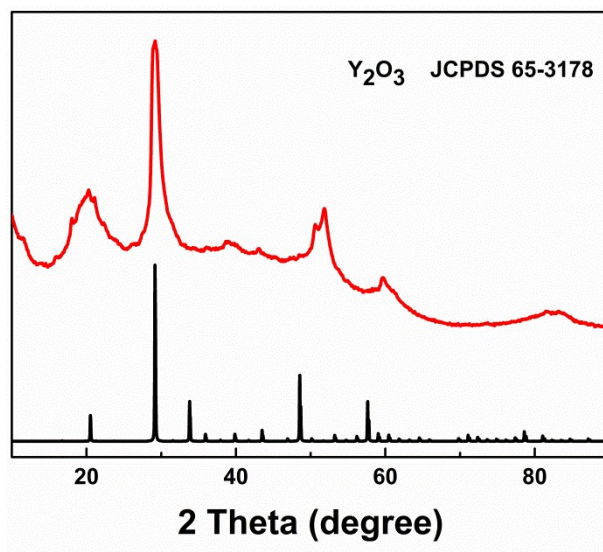

2

3

4 **Fig. S2.** XRD pattern of S-doped  $Y_2O_3$  ultrathin NSs.

5

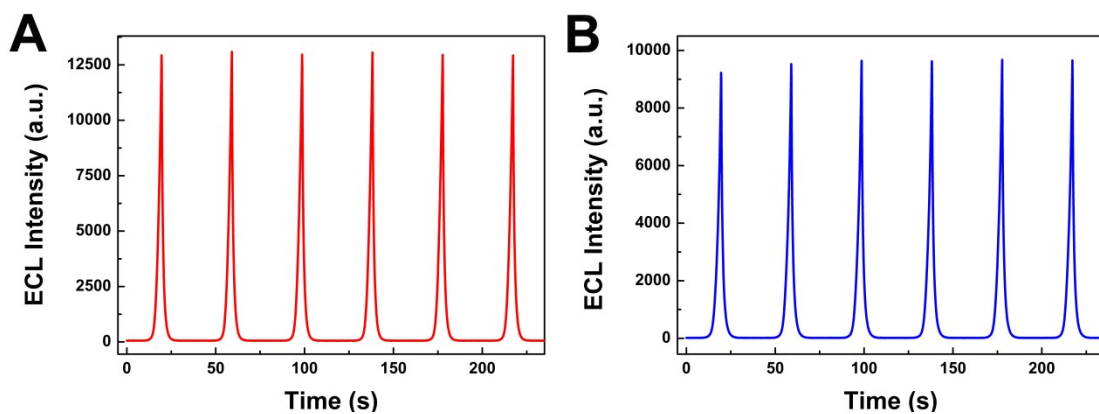

1 **Fig. S3.** Stability of ECL responses from common  $\text{Y}_2\text{O}_3$  NSs (A) and S-doped  $\text{Y}_2\text{O}_3$   
 2 nanowires (NWs) (B) solution ( $10 \mu\text{L}$ ,  $0.1 \text{ mg mL}^{-1}$ ) modified GCE during six cycles  
 3 of continuous CV scans in  $0.1 \text{ M}$  PBS buffer containing  $50 \text{ mM K}_2\text{S}_2\text{O}_8$  and  $0.1 \text{ M KCl}$   
 4 ( $n = 3$ ).

5

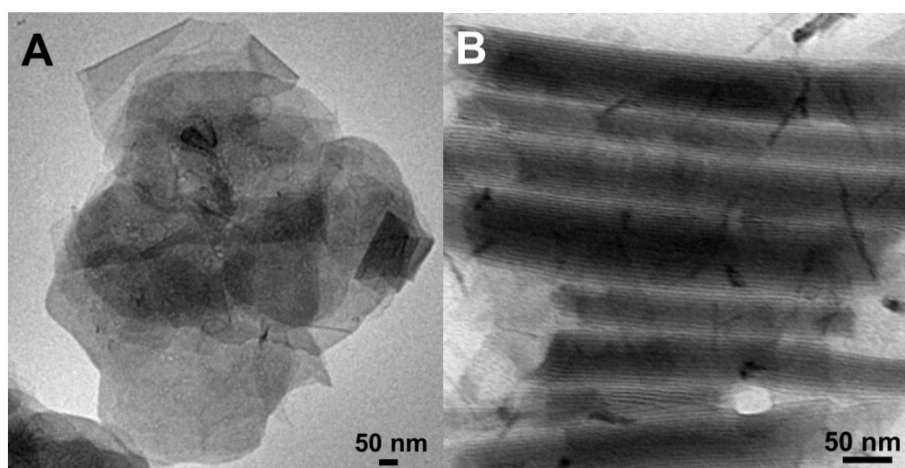

6

7

8 **Fig. S4.** TEM images of (A) the  $\text{Y}_2\text{O}_3$  NSs and (B) the S-doped  $\text{Y}_2\text{O}_3$  NWs.

9

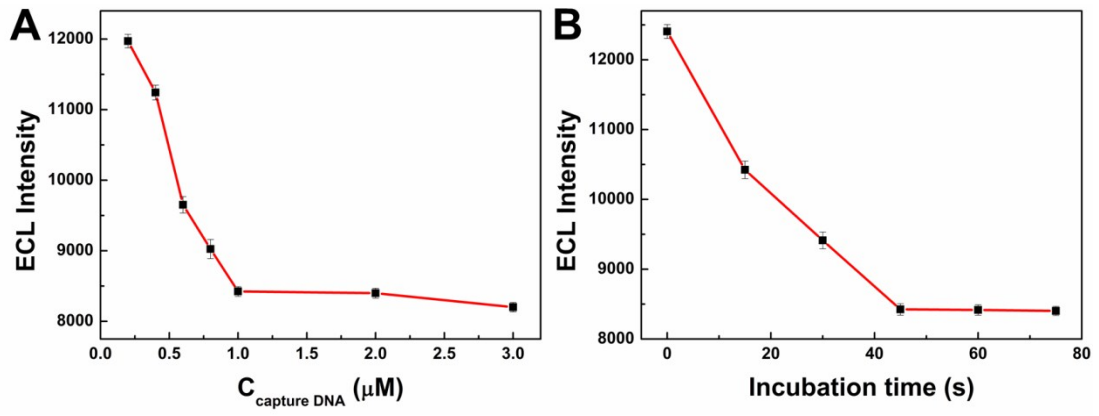

1

2

3 **Fig. S5.** Influence of capture DNA concentration (A), incubation time of anti-Dig

4 antibodies (B) on the ECL response in 0.1 M PBS buffer containing 50 mM  $\text{K}_2\text{S}_2\text{O}_8$

5 and 0.1 M KCl.

6

1 **Table S1.** Comparison of the proposed ECL biosensing strategy with the analytical  
 2 performances of other methods.

| Detection method         | Detection mechanism                                | Linear range      | Detection limit | Ref.      |
|--------------------------|----------------------------------------------------|-------------------|-----------------|-----------|
| Electrochemistry         | DNA-based electrochemical “switch”                 | 1 nM - 1 $\mu$ M  | 1 nM            | S1        |
| Electrochemistry         | Steric hindrance effects                           | 10 nM - 1 $\mu$ M | 10 nM           | S2        |
| Electrochemistry         | Structure switching of dsDNA                       | 10 nM - 100 nM    | 10 nM           | S3        |
| Electrochemistry         | Structure switching of dsDNA                       | 10 nM - 120 nM    | 5 nM            | S4        |
| Fluorescence             | DNA-mediated binding assay                         | 1 nM - 300 nM     | 1 nM            | S5        |
| Fluorescence             | Steric hindrance inhibition of strand displacement | 10 nM - 125 nM    | 5.6 nM          | S6        |
| Fluorescence             | switching stem-loop DNA scaffold                   | 10 nM - 1 $\mu$ M | 10 nM           | S7        |
| Electrochemiluminescence | Steric hindrance effects                           | 1nM - 100 nM      | 0.72 nM         | This work |

3



## 1 References

- 2 S1 A. Vallée-Bélisle, F. Ricci, T. Uzawa, F. Xia, K. W. Plaxco, *J. Am. Chem. Soc.*,  
3 2012, **134**, 15197-15200.
- 4 S2 S. S. Mahshid, S. Camiré, F. Ricci, A. Vallée-Bélisle, *J. Am. Chem. Soc.*, 2015, **137**,  
5 15596-15599.
- 6 S3 F. Ricci, G. Adornetto, D. Moscone, K. W. Plaxco, G. Palleschi, *Chem. Commun.*,  
7 2010, **46**, 1742-1744.
- 8 S4 K. J. Cash, F. Ricci, K. W. Plaxco, *J. Am. Chem. Soc.*, 2009, **131**, 6955-6957.
- 9 S5 Z. Zhang, C. Hejesen, M. B. Kjelstrup, V. Birkedal, K. V. Gothelf, *J. Am. Chem.*  
10 *Soc.*, 2014, **136**, 11115-11120.
- 11 S6 Y. Peng, X. Li, R. Yuan, Y. Xiang, *Chem. Commun.*, 2016, **52**, 12586-12589.
- 12 S7 S. Ranallo, M. Rossetti, K. W. Plaxco, A. Vallée-Bélisle, F. Ricci, *Angew. Chem.*,  
13 2016, **127**, 13412-13416.
